# Supplementary material for: Tracking sodium cobaltate formation pathways and its CO2 capture dynamics in real time with synchrotron X-ray diffraction
Source: Royal Society of Chemistry journal article supplement (doi:10.1039/d3re00459g), 2023-11-02
Supplement: d3re00459g1.pdf [file d3re00459g1.pdf]

**“Tracking Sodium Cobaltate Formation Pathways and its High Temperature CO<sub>2</sub> capture Dynamics in Real Time with Synchrotron X-ray Diffraction”**

Tables S1

**A:**

Rp = 7.9, Rwp = 6.9, Chi<sup>2</sup> = 208

| CoCO <sub>3</sub>                  |                  |                 |                 |                |
|------------------------------------|------------------|-----------------|-----------------|----------------|
| a                                  | 4.6847 (0.0002)  |                 |                 |                |
| c                                  | 15.0215 (0.0006) |                 |                 |                |
| Atom                               | x                | y               | z               | Normalized Occ |
| Co                                 | 0                | 0               | 0               | 1              |
| C                                  | 0                | 0               | 0.25            | 1              |
| O                                  | 0.7233 (0.0002)  | 0.7233 (0.0002) | 0.25            | 3              |
| Na <sub>2</sub> CO <sub>3</sub> -m |                  |                 |                 |                |
| a                                  | 8.9148 (0.0006)  |                 |                 |                |
| b                                  | 5.2433 (0.0004)  |                 |                 |                |
| c                                  | 6.0506 (0.0004)  |                 |                 |                |
| beta                               | 101.222 (0.007)  |                 |                 |                |
| Atom                               | x                | y               | z               | Normalized Occ |
| Na1                                | 0                | 0               | 0               | 1              |
| Na2                                | 0                | 0               | 0.5             | 1              |
| Na3                                | 0.1759 (0.0003)  | 0.5             | 0.7510 (0.0002) | 2              |
| C                                  | 0.1621 (0.0004)  | 0.5             | 0.2492 (0.0005) | 2              |
| O1                                 | 0.2890 (0.0003)  | 0.5             | 0.1763 (0.0006) | 2              |
| O2                                 | 0.1013 (0.0002)  | 0.2946 (0.0001) | 0.2839 (0.0002) | 4              |

**B:**

Rp = 6.8, Rwp = 7.4, Chi<sup>2</sup> = 176

| CoCO <sub>3</sub>                  |                  |                 |      |                |
|------------------------------------|------------------|-----------------|------|----------------|
| a                                  | 4.6875 (0.0002)  |                 |      |                |
| c                                  | 15.0838 (0.0007) |                 |      |                |
| Atom                               | x                | y               | z    | Normalized Occ |
| Co                                 | 0                | 0               | 0    | 1              |
| C                                  | 0                | 0               | 0.25 | 1              |
| O                                  | 0.7345 (0.0002)  | 0.7345 (0.0002) | 0.25 | 3              |
| Na <sub>2</sub> CO <sub>3</sub> -m |                  |                 |      |                |

|      |                 |  |  |
|------|-----------------|--|--|
| a    | 8.9710 (0.0008) |  |  |
| b    | 5.2612 (0.0004) |  |  |
| c    | 6.1824 (0.0005) |  |  |
| beta | 101.222 (0.007) |  |  |

| Atom | x               | y               | z               | Normalized Occ |
|------|-----------------|-----------------|-----------------|----------------|
| Na1  | 0               | 0               | 0               | 1              |
| Na2  | 0               | 0               | 0.5             | 1              |
| Na3  | 0.1762 (0.0003) | 0.5             | 0.7493 (0.0003) | 2              |
| C    | 0.1626 (0.0002) | 0.5             | 0.2508 (0.0004) | 2              |
| O1   | 0.2907 (0.0004) | 0.5             | 0.1741 (0.0004) | 2              |
| O2   | 0.1015 (0.0003) | 0.2946 (0.0001) | 0.2926 (0.0002) | 4              |

CoO

| a    | 4.0546 (0.0004) |     |     |                |
|------|-----------------|-----|-----|----------------|
| Atom | x               | y   | z   | Normalized Occ |
| Co   | 0               | 0   | 0   | 1              |
| O    | 0.5             | 0.5 | 0.5 | 1              |

**C:**

Rp = 5.2, Rwp = 4.8, Chi<sup>2</sup> = 130

Co<sub>3</sub>O<sub>4</sub>

| a    | 8.1141 (0.0005) |                 |                 |                |
|------|-----------------|-----------------|-----------------|----------------|
| Atom | x               | y               | z               | Normalized Occ |
| Co1  | 0               | 0               | 0               | 2              |
| Co2  | 0.625           | 0.625           | 0.625           | 1              |
| O    | 0.3931 (0.0003) | 0.3931 (0.0003) | 0.3931 (0.0003) | 4              |

Na<sub>2</sub>CO<sub>3</sub>-h

| a    | 5.2127 (0.0003) |                 |      |                |
|------|-----------------|-----------------|------|----------------|
| b    | 6.5012 (0.0005) |                 |      |                |
| Atom | x               | y               | z    | Normalized Occ |
| Na1  | 0.3333          | 0.6666          | 0.75 | 1              |
| Na2  | 0               | 0               | 0    | 1              |
| C    | 0.3333          | 0.6666          | 0.25 | 1              |
| O    | 0.2016 (0.0004) | 0.4032 (0.0008) | 0.25 | 3              |

**D:**

Rp = 5.1, Rwp = 3.9, Chi<sup>2</sup> = 77

Co<sub>3</sub>O<sub>4</sub>

| a    |                 |                 |                 |                 |
|------|-----------------|-----------------|-----------------|-----------------|
|      |                 |                 |                 | 8.1175 (0.0003) |
| Atom | x               | y               | z               | Normalized Occ  |
| Co1  | 0               | 0               | 0               | 2               |
| Co2  | 0.625           | 0.625           | 0.625           | 1               |
| O    | 0.3942 (0.0005) | 0.3942 (0.0005) | 0.3942 (0.0005) | 4               |

Na<sub>2</sub>CO<sub>3</sub>-h

| a    |                 |                 |      |                 |
|------|-----------------|-----------------|------|-----------------|
|      |                 |                 |      | 5.2127 (0.0002) |
| b    |                 |                 |      |                 |
|      |                 |                 |      | 6.5012 (0.0005) |
| Atom | x               | y               | z    | Normalized Occ  |
| Na1  | 0.3333          | 0.6666          | 0.75 | 1               |
| Na2  | 0               | 0               | 0    | 1               |
| C    | 0.3333          | 0.6666          | 0.25 | 1               |
| O    | 0.2024 (0.0004) | 0.4047 (0.0004) | 0.25 | 3               |

E:

R<sub>p</sub> = 8.3, R<sub>wp</sub> = 6.1, Chi<sup>2</sup> = 118

Co<sub>3</sub>O<sub>4</sub>

| a    |                 |                 |                 |                 |
|------|-----------------|-----------------|-----------------|-----------------|
|      |                 |                 |                 | 8.1468 (0.0004) |
| Atom | x               | y               | z               | Normalized Occ  |
| Co1  | 0               | 0               | 0               | 2               |
| Co2  | 0.625           | 0.625           | 0.625           | 1               |
| O    | 0.3873 (0.0005) | 0.3873 (0.0005) | 0.3873 (0.0005) | 4               |

Na<sub>2</sub>CO<sub>3</sub>-h

| a    |                 |                 |      |                 |
|------|-----------------|-----------------|------|-----------------|
|      |                 |                 |      | 5.2206 (0.0002) |
| b    |                 |                 |      |                 |
|      |                 |                 |      | 6.7633 (0.0005) |
| Atom | x               | y               | z    | Normalized Occ  |
| Na1  | 0.3333          | 0.6666          | 0.75 | 1               |
| Na2  | 0               | 0               | 0    | 1               |
| C    | 0.3333          | 0.6666          | 0.25 | 1               |
| O    | 0.2021 (0.0003) | 0.4042 (0.0005) | 0.25 | 3               |

Na<sub>0.74</sub>CO<sub>2</sub>

| a    |        |        |                |                  |
|------|--------|--------|----------------|------------------|
|      |        |        |                | 2.8561 (0.0003)  |
| b    |        |        |                |                  |
|      |        |        |                | 11.0892 (0.0006) |
| Atom | x      | y      | z              | Normalized Occ   |
| Na1  | 0.3333 | 0.6666 | 0.25           | 0.51 (0.01)      |
| Na2  | 0      | 0      | 0.25           | 0.22 (0.01)      |
| Co   | 0      | 0      | 0              | 1                |
| O    | 0.6666 | 0.3333 | 0.0908 (0.003) | 2                |

F:

Rp = 9.1, Rwp = 6.6, Chi<sup>2</sup> = 210

| Co <sub>3</sub> O <sub>4</sub>     |                  |                 |                 |                |
|------------------------------------|------------------|-----------------|-----------------|----------------|
| a                                  | 8.1220 (0.0005)  |                 |                 |                |
| Atom                               | X                | y               | z               | Normalized Occ |
| Co1                                | 0                | 0               | 0               | 2              |
| Co2                                | 0.625            | 0.625           | 0.625           | 1              |
| O                                  | 0.3792 (0.0004)  | 0.3792 (0.0004) | 0.3792 (0.0004) | 4              |
| Na <sub>2</sub> CO <sub>3</sub> -h |                  |                 |                 |                |
| a                                  | 5.228 (0.002)    |                 |                 |                |
| b                                  | 6.782 (0.003)    |                 |                 |                |
| Atom                               | x                | y               | z               | Normalized Occ |
| Na1                                | 0.3333           | 0.6666          | 0.75            | 1              |
| Na2                                | 0                | 0               | 0               | 1              |
| C                                  | 0.3333           | 0.6666          | 0.25            | 1              |
| O                                  | 0.2012 (0.0003)  | 0.4024 (0.0006) | 0.25            | 3              |
| Na <sub>0.74</sub> CO <sub>2</sub> |                  |                 |                 |                |
| a                                  | 2.8561 (0.0003)  |                 |                 |                |
| b                                  | 11.0892 (0.0006) |                 |                 |                |
| Atom                               | x                | y               | z               | Normalized Occ |
| Na1                                | 0.3333           | 0.6666          | 0.25            | 0.47 (0.01)    |
| Na2                                | 0                | 0               | 0.25            | 0.27 (0.03)    |
| Co                                 | 0                | 0               | 0               | 1              |
| O                                  | 0.6666           | 0.3333          | 0.0911 (0.003)  | 2              |

Tables S2.

**A:**

Rp = 4.9, Rwp = 5.1, Chi<sup>2</sup> = 27

| Co <sub>3</sub> O <sub>4</sub>     |                 |                 |                 |                |
|------------------------------------|-----------------|-----------------|-----------------|----------------|
| a                                  | 8.0582 (0.0004) |                 |                 |                |
| Atom                               | x               | y               | z               | Normalized Occ |
| Co1                                | 0               | 0               | 0               | 2              |
| Co2                                | 0.625           | 0.625           | 0.625           | 1              |
| O                                  | 0.3892 (0.0002) | 0.3892 (0.0002) | 0.3892 (0.0002) | 3              |
| Na <sub>2</sub> CO <sub>3</sub> -m |                 |                 |                 |                |
| a                                  | 8.9035 (0.0003) |                 |                 |                |
| b                                  | 5.2304 (0.0003) |                 |                 |                |
| c                                  | 6.0748 (0.0002) |                 |                 |                |
| beta                               | 100.771 (0.002) |                 |                 |                |
| Atom                               | x               | y               | z               | Normalized Occ |
| Na1                                | 0               | 0               | 0               | 1              |
| Na2                                | 0               | 0               | 0.5             | 1              |
| Na3                                | 0.1760 (0.0004) | 0.5             | 0.7478 (0.0002) | 2              |
| C                                  | 0.1635 (0.0004) | 0.5             | 0.2487 (0.0002) | 2              |
| O1                                 | 0.2899 (0.0008) | 0.5             | 0.1785 (0.0005) | 2              |
| O2                                 | 0.1021 (0.0003) | 0.2956 (0.0003) | 0.2857 (0.0003) | 4              |

**B:**

Rp = 4.6, Rwp = 9.4, Chi<sup>2</sup> = 19

| Co <sub>3</sub> O <sub>4</sub>     |                 |                 |                 |                |
|------------------------------------|-----------------|-----------------|-----------------|----------------|
| a                                  | 8.1053 (0.0002) |                 |                 |                |
| Atom                               | x               | y               | z               | Normalized Occ |
| Co1                                | 0               | 0               | 0               | 2              |
| Co2                                | 0.625           | 0.625           | 0.625           | 1              |
| O                                  | 0.3886 (0.0004) | 0.3886 (0.0004) | 0.3886 (0.0004) | 3              |
| Na <sub>2</sub> CO <sub>3</sub> -m |                 |                 |                 |                |
| a                                  | 9.0041 (0.0004) |                 |                 |                |
| b                                  | 5.1499 (0.0006) |                 |                 |                |
| c                                  | 6.0840 (0.0008) |                 |                 |                |
| beta                               | 102.638 (0.009) |                 |                 |                |
| Atom                               | x               | y               | z               | Normalized Occ |
| Na1                                | 0               | 0               | 0               | 1              |

|     |                 |                 |                 |   |
|-----|-----------------|-----------------|-----------------|---|
| Na2 | 0               | 0               | 0.5             | 1 |
| Na3 | 0.1803 (0.0003) | 0.5             | 0.7399 (0.0005) | 2 |
| C   | 0.1726 (0.0007) | 0.5             | 0.2496 (0.0003) | 2 |
| O1  | 0.2896 (0.0004) | 0.5             | 0.1768 (0.0003) | 2 |
| O2  | 0.1036 (0.0006) | 0.2953 (0.0003) | 0.2895 (0.0004) | 4 |

Co<sub>2</sub>O<sub>3</sub>

| a    | 7.8979 (0.0004) |       |       |                |
|------|-----------------|-------|-------|----------------|
| Atom | x               | y     | z     | Normalized Occ |
| Co1  | 0.125           | 0.125 | 0.125 | 1              |
| Co2  | 0.5             | 0.5   | 0.5   | 0.83333        |
| O    | 0.25            | 0.25  | 0.25  | 3              |

C:

Rp = 2.1, Rwp = 3.4, Chi<sup>2</sup> = 16

Co<sub>3</sub>O<sub>4</sub>

| a    | 7.9097 (0.0006) |                 |                 |                |
|------|-----------------|-----------------|-----------------|----------------|
| Atom | x               | y               | z               | Normalized Occ |
| Co1  | 0               | 0               | 0               | 2              |
| Co2  | 0.625           | 0.625           | 0.625           | 1              |
| O    | 0.3892 (0.0003) | 0.3892 (0.0003) | 0.3892 (0.0003) | 3              |

Na<sub>2</sub>CO<sub>3</sub>-m

| a    | 9.2719 (0.0004) |                 |                 |                |
|------|-----------------|-----------------|-----------------|----------------|
| b    | 5.1499 (0.0006) |                 |                 |                |
| c    | 6.4162 (0.0008) |                 |                 |                |
| beta | 100.237 (0.009) |                 |                 |                |
| Atom | x               | y               | z               | Normalized Occ |
| Na1  | 0               | 0               | 0               | 1              |
| Na2  | 0               | 0               | 0.5             | 1              |
| Na3  | 0.1826 (0.0006) | 0.5             | 0.7407 (0.0005) | 2              |
| C    | 0.1706 (0.0008) | 0.5             | 0.2479 (0.0007) | 2              |
| O1   | 0.2877 (0.0004) | 0.5             | 0.1766 (0.0007) | 2              |
| O2   | 0.1055 (0.0004) | 0.2966 (0.0004) | 0.2897 (0.0002) | 4              |

Co<sub>2</sub>O<sub>3</sub>

| a    | 7.9097 (0.0005) |       |       |                |
|------|-----------------|-------|-------|----------------|
| Atom | x               | y     | z     | Normalized Occ |
| Co1  | 0.125           | 0.125 | 0.125 | 1              |
| Co2  | 0.5             | 0.5   | 0.5   | 0.83333        |

O                                      0.25                                      0.25                                      0.25                                      3

**D:**

Rp = 8.2, Rwp = 5.5, Chi<sup>2</sup> = 181

| Co <sub>3</sub> O <sub>4</sub> |                 |                 |                 |                |
|--------------------------------|-----------------|-----------------|-----------------|----------------|
| a                              | 8.1004 (0.0005) |                 |                 |                |
| Atom                           | x               | y               | z               | Normalized Occ |
| Co1                            | 0               | 0               | 0               | 2              |
| Co2                            | 0.625           | 0.625           | 0.625           | 1              |
| O                              | 0.3872 (0.0005) | 0.3872 (0.0005) | 0.3872 (0.0005) | 4              |

| Na <sub>2</sub> CO <sub>3</sub> -h |                 |                 |      |                |
|------------------------------------|-----------------|-----------------|------|----------------|
| a                                  | 5.1988 (0.0003) |                 |      |                |
| b                                  | 6.6976 (0.0005) |                 |      |                |
| Atom                               | x               | y               | z    | Normalized Occ |
| Na1                                | 0.3333          | 0.6666          | 0.75 | 1              |
| Na2                                | 0               | 0               | 0    | 1              |
| C                                  | 0.3333          | 0.6666          | 0.25 | 1              |
| O                                  | 0.2018 (0.0004) | 0.4036 (0.0008) | 0.25 | 3              |

**E:**

Rp = 8.8, Rwp = 7.3, Chi<sup>2</sup> = 186

| Co <sub>3</sub> O <sub>4</sub> |                 |                 |                 |                |
|--------------------------------|-----------------|-----------------|-----------------|----------------|
| a                              | 8.1468 (0.0004) |                 |                 |                |
| Atom                           | x               | y               | z               | Normalized Occ |
| Co1                            | 0               | 0               | 0               | 2              |
| Co2                            | 0.625           | 0.625           | 0.625           | 1              |
| O                              | 0.3873 (0.0005) | 0.3873 (0.0005) | 0.3873 (0.0005) | 4              |

| Na <sub>2</sub> CO <sub>3</sub> -h |                 |                 |      |                |
|------------------------------------|-----------------|-----------------|------|----------------|
| a                                  | 5.197 (0.0002)  |                 |      |                |
| b                                  | 6.6992 (0.0005) |                 |      |                |
| Atom                               | x               | y               | z    | Normalized Occ |
| Na1                                | 0.3333          | 0.6666          | 0.75 | 1              |
| Na2                                | 0               | 0               | 0    | 1              |
| C                                  | 0.3333          | 0.6666          | 0.25 | 1              |
| O                                  | 0.2014 (0.0003) | 0.4028 (0.0005) | 0.25 | 3              |
| Na <sub>0.74</sub> CO <sub>2</sub> |                 |                 |      |                |
| a                                  | 2.8414 (0.0004) |                 |      |                |

| b    |        | 11.034 (0.002) |                |                |
|------|--------|----------------|----------------|----------------|
| Atom | x      | y              | z              | Normalized Occ |
| Na1  | 0.3333 | 0.6666         | 0.25           | 0.51 (0.01)    |
| Na2  | 0      | 0              | 0.25           | 0.23 (0.02)    |
| Co   | 0      | 0              | 0              | 1              |
| O    | 0.6666 | 0.3333         | 0.0903 (0.003) | 2              |

**F:**

Rp = 6.5, Rwp = 7.4, Chi<sup>2</sup> = 106

| Na <sub>2</sub> CO <sub>3</sub> -h |                 |                 |      |                |
|------------------------------------|-----------------|-----------------|------|----------------|
| a                                  |                 | 5.226 (0.003)   |      |                |
| b                                  |                 | 6.598 (0.007)   |      |                |
| Atom                               | x               | y               | z    | Normalized Occ |
| Na1                                | 0.3333          | 0.6666          | 0.75 | 1              |
| Na2                                | 0               | 0               | 0    | 1              |
| C                                  | 0.3333          | 0.6666          | 0.25 | 1              |
| O                                  | 0.2016 (0.0003) | 0.4032 (0.0007) | 0.25 | 3              |

| Na <sub>0.74</sub> CO <sub>2</sub> |        |                 |                |                |
|------------------------------------|--------|-----------------|----------------|----------------|
| a                                  |        | 2.8438 (0.0002) |                |                |
| b                                  |        | 11.012 (0.002)  |                |                |
| Atom                               | x      | y               | z              | Normalized Occ |
| Na1                                | 0.3333 | 0.6666          | 0.25           | 0.47 (0.01)    |
| Na2                                | 0      | 0               | 0.25           | 0.27 (0.03)    |
| Co                                 | 0      | 0               | 0              | 1              |
| O                                  | 0.6666 | 0.3333          | 0.0909 (0.003) | 2              |



**Tables S3****Beginning (50 °C):**Rp = 8.3, Rwp = 8.2, Chi<sup>2</sup> = 193

| Na <sub>0.74</sub> CO <sub>2</sub> |                  |        |                 |                |
|------------------------------------|------------------|--------|-----------------|----------------|
| a                                  | 2.8284 (0.0005)  |        |                 |                |
| b                                  | 10.8894 (0.0003) |        |                 |                |
| Atom                               | x                | y      | z               | Normalized Occ |
| Na1                                | 0.3333           | 0.6666 | 0.25            | 0.47 (0.02)    |
| Na2                                | 0                | 0      | 0.25            | 0.26 (0.02)    |
| Co                                 | 0                | 0      | 0               | 1              |
| O                                  | 0.6666           | 0.3333 | 0.1073 (0.0006) | 2              |

**Halfway (500 °C):**Rp = 9.8, Rwp = 8.4, Chi<sup>2</sup> = 167

| Co <sub>3</sub> O <sub>4</sub> |                 |                 |                 |                |
|--------------------------------|-----------------|-----------------|-----------------|----------------|
| a                              | 8.0748 (0.0003) |                 |                 |                |
| Atom                           | x               | y               | z               | Normalized Occ |
| Co1                            | 0               | 0               | 0               | 2              |
| Co2                            | 0.625           | 0.625           | 0.625           | 1              |
| O                              | 0.3896 (0.0005) | 0.3896 (0.0005) | 0.3896 (0.0005) | 4              |

| Na <sub>2</sub> CO <sub>3</sub> -h |                 |                 |      |                |
|------------------------------------|-----------------|-----------------|------|----------------|
| a                                  | 5.3658 (0.0005) |                 |      |                |
| b                                  | 6.7092 (0.0003) |                 |      |                |
| Atom                               | x               | y               | z    | Normalized Occ |
| Na1                                | 0.3333          | 0.6666          | 0.75 | 1              |
| Na2                                | 0               | 0               | 0    | 1              |
| C                                  | 0.3333          | 0.6666          | 0.25 | 1              |
| O                                  | 0.2554 (0.0003) | 0.5108 (0.0006) | 0.25 | 3              |

| Na <sub>0.74</sub> CO <sub>2</sub> |                  |        |               |                |
|------------------------------------|------------------|--------|---------------|----------------|
| a                                  | 2.8469 (0.0003)  |        |               |                |
| b                                  | 11.0965 (0.0006) |        |               |                |
| Atom                               | x                | y      | z             | Normalized Occ |
| Na1                                | 0.3333           | 0.6666 | 0.25          | 0.53 (0.01)    |
| Na2                                | 0                | 0      | 0.25          | 0.22 (0.02)    |
| Co                                 | 0                | 0      | 0             | 1              |
| O                                  | 0.6666           | 0.3333 | 0.101 (0.003) | 2              |

**End (700 °C):**

Rp = 8.8, Rwp = 7.3, Chi<sup>2</sup> = 45.2

| Co <sub>3</sub> O <sub>4</sub>     |                 |                 |                 |                |
|------------------------------------|-----------------|-----------------|-----------------|----------------|
| a                                  | 8.1132 (0.0003) |                 |                 |                |
| Atom                               | x               | y               | z               | Normalized Occ |
| Co1                                | 0               | 0               | 0               | 2              |
| Co2                                | 0.625           | 0.625           | 0.625           | 1              |
| O                                  | 0.3862 (0.0003) | 0.3862 (0.0003) | 0.3862 (0.0003) | 4              |
| Na <sub>2</sub> CO <sub>3</sub> -h |                 |                 |                 |                |
| a                                  | 5.4036 (0.0005) |                 |                 |                |
| b                                  | 6.6956 (0.0004) |                 |                 |                |
| Atom                               | x               | y               | z               | Normalized Occ |
| Na1                                | 0.3333          | 0.6666          | 0.75            | 1              |
| Na2                                | 0               | 0               | 0               | 1              |
| C                                  | 0.3333          | 0.6666          | 0.25            | 1              |
| O                                  | 0.2613 (0.0002) | 0.5226 (0.0004) | 0.25            | 3              |
